# Supplementary material for: PFKFB3 blockade inhibits hepatocellular carcinoma growth by impairing DNA repair through AKT
Source: PubMed Central journal article supplement (PMC5861039; doi:10.1038/s41419-018-0435-y), 2018-03-20

SMMC7721

shVector

DAPI

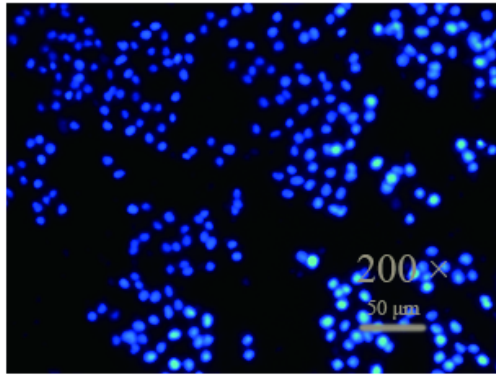

PFKFB3

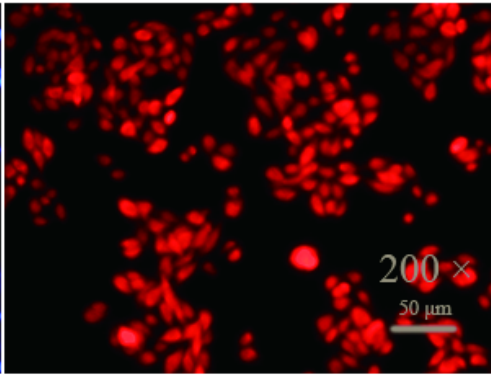

Merge

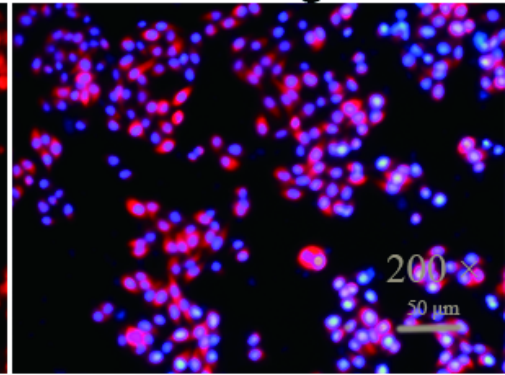

shPFKFB3

DAPI

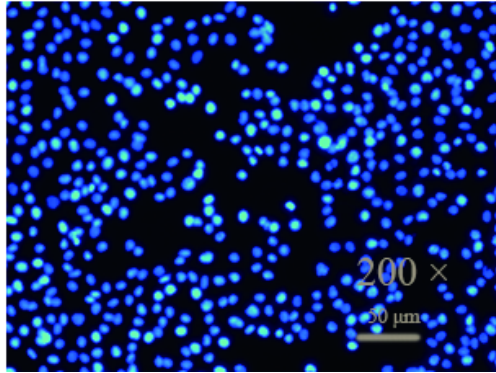

PFKFB3

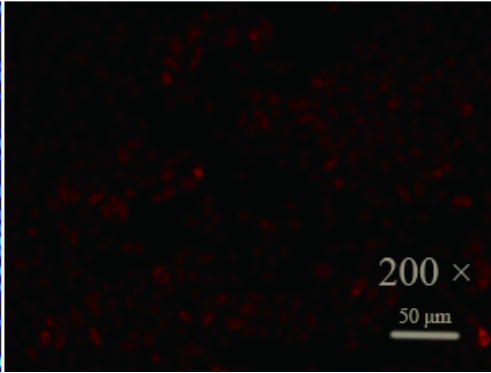

Merge

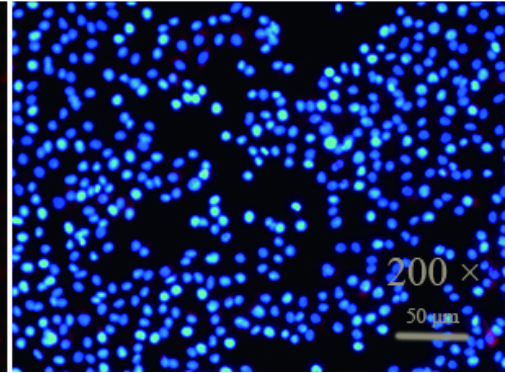

Supplement: 41419_2018_435_MOESM2_ESM.pdf [file 41419_2018_435_MOESM2_ESM.pdf]
